# Supplementary material for: Baseline serum HBV RNA is associated with the risk of hepatitis flare after stopping nucleoside analog therapy in HBeAg-negative participants
Source: PubMed Central journal article supplement — Hepatol Commun. 2023 Jul 17;7(8):e0188. doi: 10.1097/HC9.0000000000000188 (PMC10351945; doi:10.1097/hc9.0000000000000188), 2023-07-17
Supplement: hc9-7-e0188-s001.pdf [file hc9-7-e0188-s001.pdf]

**Supplementary Data** for Thompson et al. 2022 “Baseline Serum HBV RNA is Associated with Risk of Hepatitis Flare after Stopping Nucleoside Analog Therapy in HBeAg-negative Participants”

Figure S1. Cumulative incidence analysis for virological relapse (A), biochemical relapse (B), and hepatitis flare (C) in patients with detectable (red) or undetectable (blue) HBV RNA at baseline. .... 2

Figure S2. Cumulative incidence analysis for HBV RNA detectability in all patients (black) or patients that had been treated with ETV (blue) vs TDF (red). .... 3

Figure S3. Mean HBV RNA (green) and DNA (blue) concentrations over time after stopping NA therapy..... 4

Figure S4. Receiver-operator curves for RNA (dashes line) and DNA (solid line) as predictors of subsequent ALT flare..... 5

Figure S5. Individual profiles for RNA, DNA, ALT and HBsAg after cessation of NA therapy. .... 6

Table S1. Rates of virological relapse, biochemical relapse, and hepatitis flare according to baseline HBV RNA detection and HBsAg level ..... 15

Table S2. Agreement analysis for HBV RNA or DNA with ALT flares (>5x ULN) ..... 17

**Figure S1. Cumulative incidence analysis for virological relapse (A), biochemical relapse (B), and hepatitis flare (C) in patients with detectable (red) or undetectable (blue) HBV RNA at baseline.**

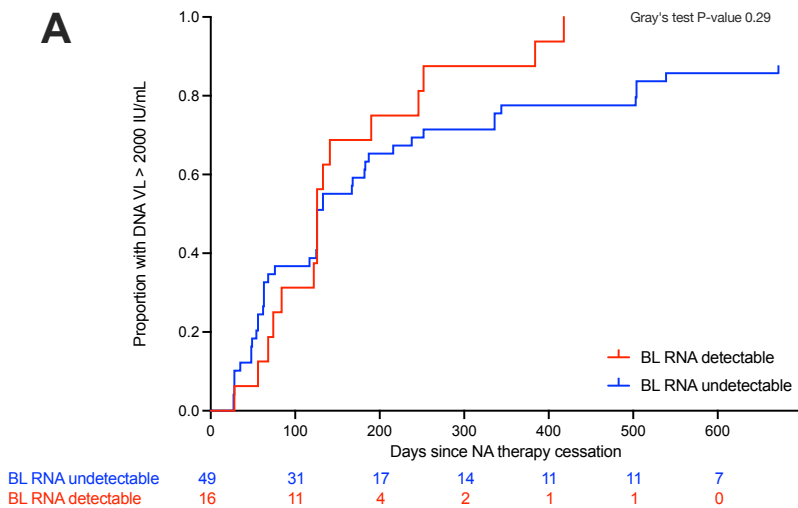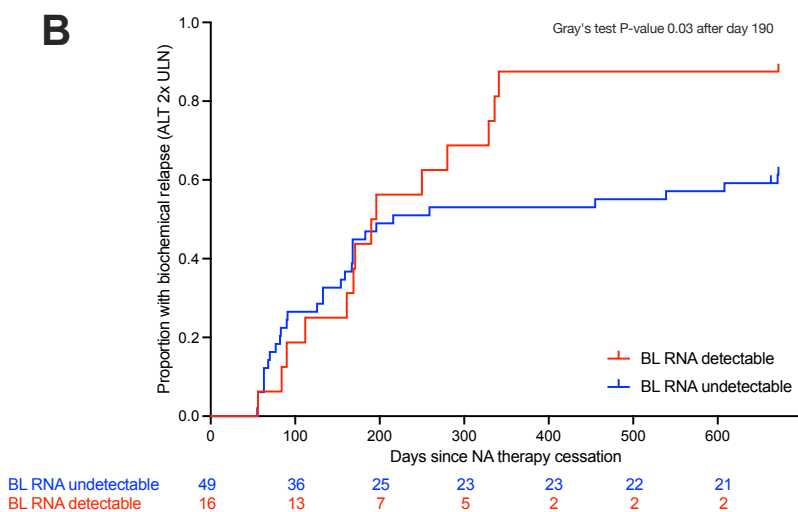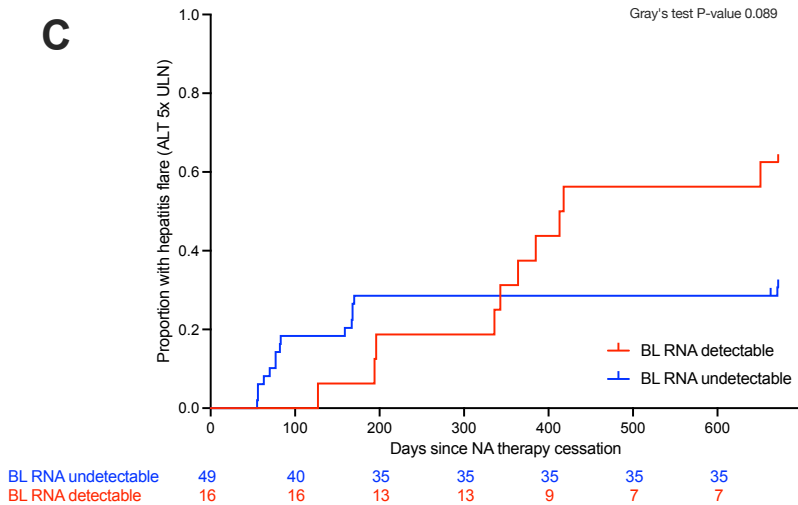

**Figure S2. Cumulative incidence analysis for HBV RNA detectability in all patients (black) or patients that had been treated with ETV (blue) vs TDF (red).**

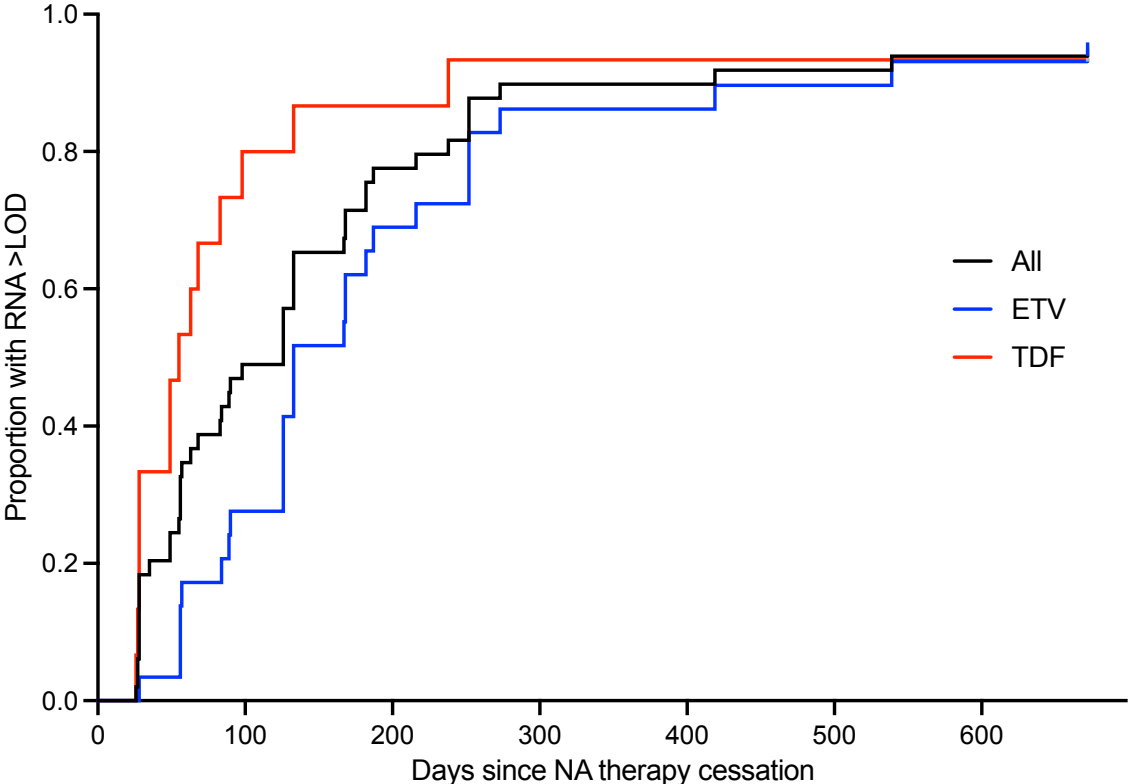

|      |    |    |    |   |   |   |   |
|------|----|----|----|---|---|---|---|
| All: | 49 | 25 | 11 | 5 | 5 | 4 | 3 |
| ETV: | 29 | 21 | 9  | 4 | 4 | 3 | 2 |
| TDF: | 15 | 3  | 2  | 1 | 1 | 1 | 1 |

**Figure S3. Mean HBV RNA (green) and DNA (blue) concentrations over time after stopping NA therapy.**

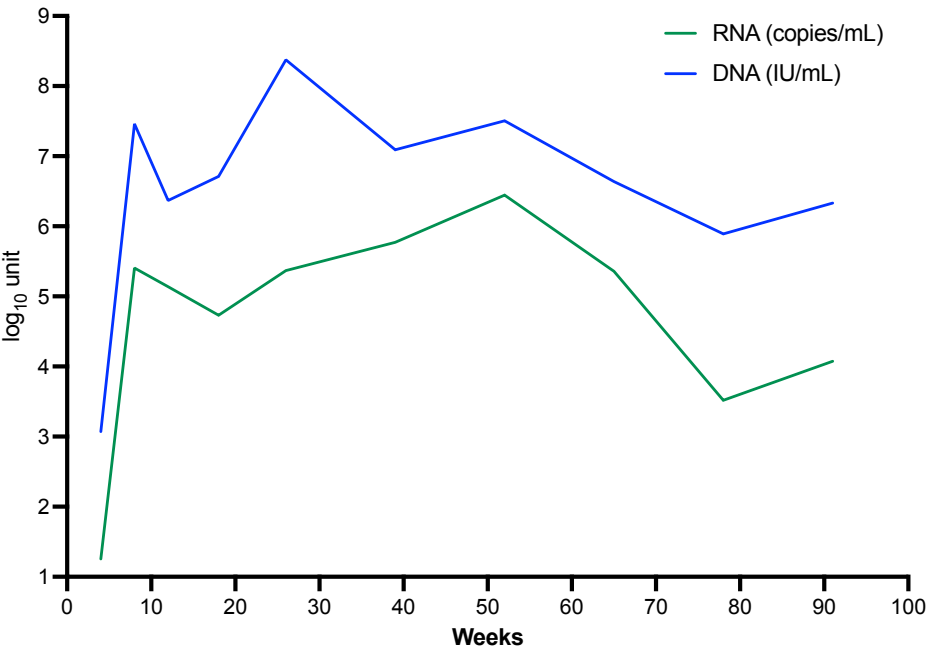

**Figure S4. Receiver-operator curves for RNA (dashes line) and DNA (solid line) as predictors of subsequent ALT flare.** Comparing the curves of the two independent markers shows they are not different statistically (DeLong's test  $p=0.97$ ).

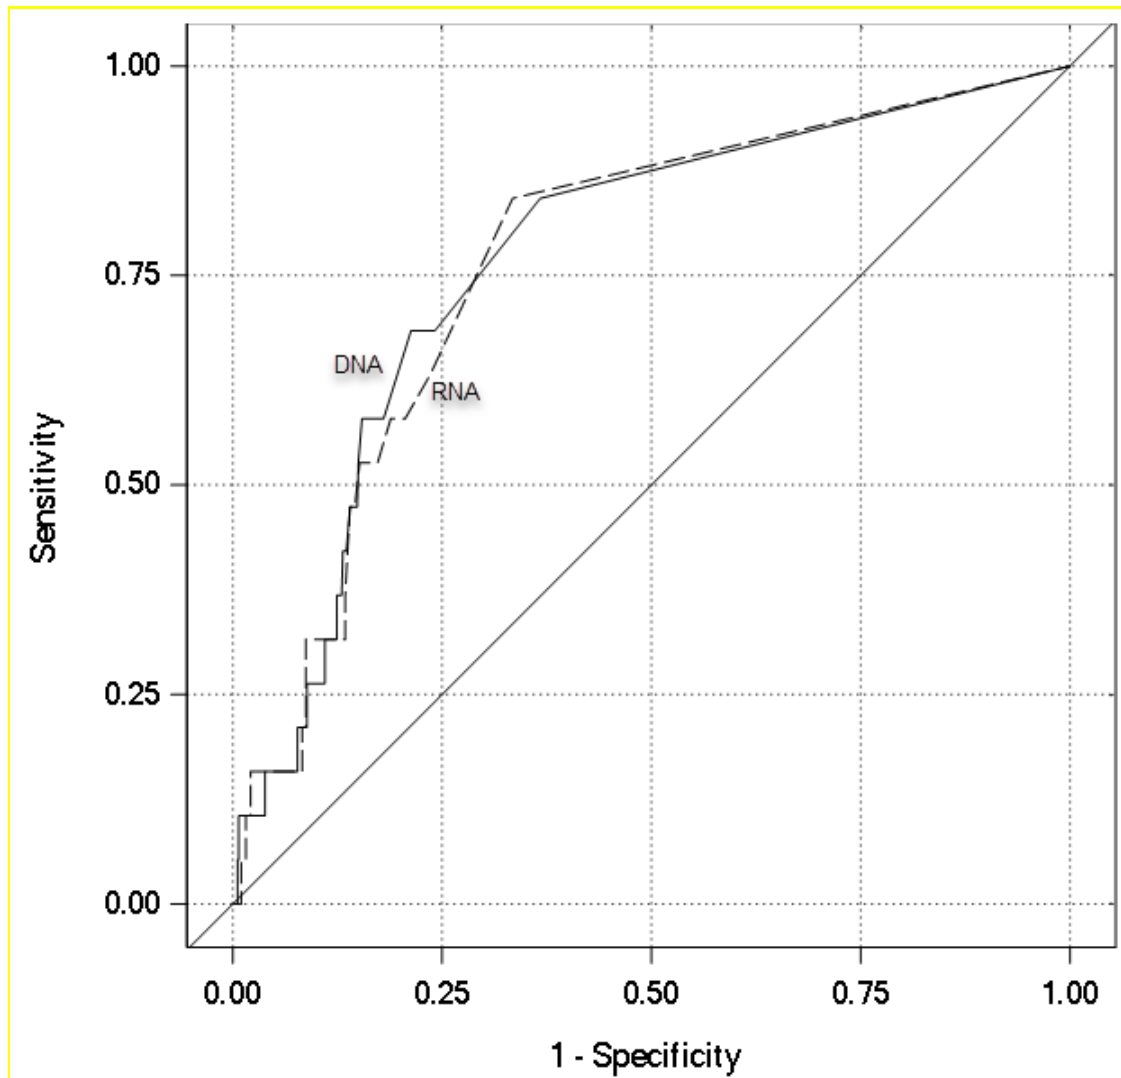

**Figure S5. Individual profiles for RNA, DNA, ALT and HBsAg after cessation of NA therapy.**

















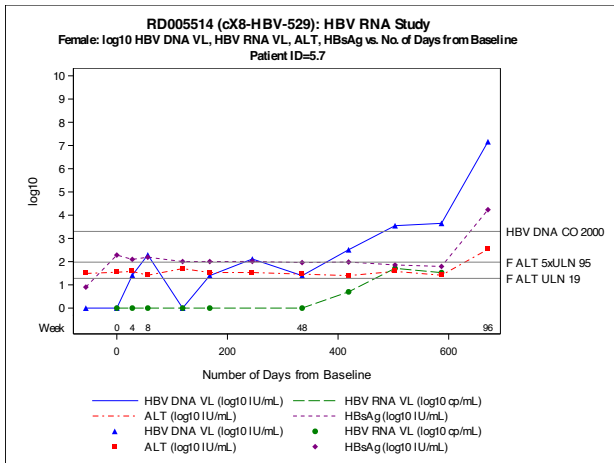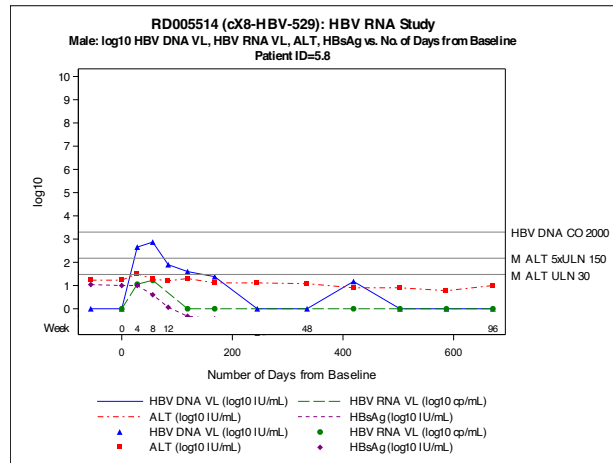

Figure S5

**Table S1. Rates of virological relapse, biochemical relapse, and hepatitis flare according to baseline HBV RNA detection and HBsAg level**

|                                            | <b>N (%) with virological relapse<sup>a</sup></b> | <b>P-value<sup>b</sup></b> | <b>N (%) with biochemical relapse<sup>c</sup></b> | <b>P-value</b> | <b>N (%) with hepatitis flare<sup>d</sup></b> | <b>P-value</b> |
|--------------------------------------------|---------------------------------------------------|----------------------------|---------------------------------------------------|----------------|-----------------------------------------------|----------------|
| HBV RNA not detected                       | 42/49 (86%)                                       | 0.18                       | 25/49 (51%)                                       | 0.04           | 15/49 (31%)                                   | 0.04           |
| HBV RNA detected                           | 16/16 (100%)                                      |                            | 13/16 (81%)                                       |                | 10/16 (63%)                                   |                |
| HBsAg ≤ 100 IU/mL                          | 5/10 (50%)                                        | 0.0006                     | 4/10 (40%)                                        | 0.30           | 2/10 (20%)                                    | 0.29           |
| HBsAg > 100 IU/mL                          | 53/55 (96%)                                       |                            | 34/55 (62%)                                       |                | 23/55 (42%)                                   |                |
| HBsAg ≤ 1000 IU/mL                         | 31/36 (86%)                                       | 0.45                       | 18/36 (50%)                                       | 0.14           | 12/36 (33%)                                   | 0.44           |
| HBsAg > 1000 IU/mL                         | 27/29 (93%)                                       |                            | 20/29 (69%)                                       |                | 13/29 (45%)                                   |                |
| HBsAg ≤ 100 IU/mL and HBV RNA not detected | 4/9 (44%)                                         | 0.0009                     | 3/9 (33%)                                         | 0.08           | 1/9 (11%)                                     | 0.04           |
| HBsAg ≤ 100 IU/mL and HBV RNA detected     | 1/1 (100%)                                        |                            | 1/1 (100%)                                        |                | 1/1 (100%)                                    |                |
| HBsAg > 100 IU/mL and HBV RNA not detected | 38/40 (95%)                                       |                            | 22/40 (55%)                                       |                | 14/40 (35%)                                   |                |
| HBsAg > 100 IU/mL and HBV RNA detected     | 15/15 (100%)                                      |                            | 12/15 (80%)                                       |                | 9/15 (60%)                                    |                |

|                                             | <b>N (%) with virological relapse<sup>a</sup></b> | <b>P-value<sup>b</sup></b> | <b>N (%) with biochemical relapse<sup>c</sup></b> | <b>P-value</b> | <b>N (%) with hepatitis flare<sup>d</sup></b> | <b>P-value</b> |
|---------------------------------------------|---------------------------------------------------|----------------------------|---------------------------------------------------|----------------|-----------------------------------------------|----------------|
| HBsAg ≤ 1000 IU/mL and HBV RNA not detected | 24/29 (83%)                                       |                            | 12/29 (41%)                                       |                | 6/29 (21%)                                    |                |
| HBsAg ≤ 1000 IU/mL and HBV RNA detected     | 7/7 (100%)                                        | 0.58                       | 6/7 (86%)                                         | 0.075          | 6/7 (86%)                                     | 0.01           |
| HBsAg > 1000 IU/mL and HBV RNA not detected | 18/20 (90%)                                       |                            | 13/20 (65%)                                       |                | 9/20 (45%)                                    |                |
| HBsAg > 1000 IU/mL and HBV RNA detected     | 9/9 (100%)                                        |                            | 7/9 (78%)                                         |                | 4/9 (44%)                                     |                |

<sup>a</sup> HBV DNA > 2000 IU/mL at week 96

<sup>b</sup> P-values from Fisher's Exact Test for HBV RNA and HBsAg, or Freeman-Halton (27) for the combination

<sup>c</sup> ALT > 2x ULN and HBV DNA > 2000 IU/mL at week 96

<sup>d</sup> ALT > 5x ULN and HBV DNA > 2000 IU/mL at week 96



**Table S2. Agreement analysis for HBV RNA or DNA with ALT flares (>5x ULN)**

| HBV RNA        |              | ALT Flare 5x ULN |     |       | Measure <sup>1</sup> | Agreement      |                     |
|----------------|--------------|------------------|-----|-------|----------------------|----------------|---------------------|
|                |              | Yes              | No  | Total |                      | % (n/N)        | 95% CI <sup>2</sup> |
| >128 cp/mL     | <b>Yes</b>   | 11               | 168 | 179   | PPA                  | 57.9 (11/19)   | 36.3, 76.9          |
|                | <b>No</b>    | 8                | 557 | 565   | NPA                  | 76.8 (557/725) | 73.6, 79.8          |
|                | <b>Total</b> | 19               | 725 | 744   | OPA                  | 76.3 (568/744) | 76.3, 73.2          |
| <b>HBV DNA</b> |              |                  |     |       |                      |                |                     |
| >16,637 IU/mL  | <b>Yes</b>   | 15               | 216 | 231   | PPA                  | 62.5 (15/24)   | 42.7, 78.8          |
|                | <b>No</b>    | 9                | 719 | 728   | NPA                  | 76.9 (719/935) | 74.1, 79.5          |
|                | <b>Total</b> | 24               | 935 | 959   | OPA                  | 76.5 (734/959) | 73.8, 79.1          |

<sup>1</sup> PPA=Positive Percent Agreement, NPA=Negative Percent Agreement, OPA=Overall Percent Agreement.

<sup>2</sup> Wilson Score Confidence Interval.
